# Supplementary material
Source: publisher figshare collection journal article supplement (https://sage.figshare.com/ndownloader/files/18531311)
Supplement: Supplementary file 1 [file 18531311]

| Topic                 | No. S-O Papers | No. Papers with Analogy | Analogy                                                                                                                                                                                                                                                                                                                                                                                                                                                                                                                                                                                                               |
|-----------------------|----------------|-------------------------|-----------------------------------------------------------------------------------------------------------------------------------------------------------------------------------------------------------------------------------------------------------------------------------------------------------------------------------------------------------------------------------------------------------------------------------------------------------------------------------------------------------------------------------------------------------------------------------------------------------------------|
| Urban Design/Planning | 12             | 4                       | City is an organism or tree (Ganis et al., 2016)*.<br>City is an organism and tactical urbanism the energy for its evolution (Silva, 2016).<br>Metabolism is urban economy with city as organism (Girard, 2014).<br>Metabolism is urban economy with city as ecosystem (Girard, 2014).<br>Assembly of molecules to form life akin to assembly of elements to form cities, including translational mechanisms e.g. genetic blueprints (Salingaros, 2010).<br>City as living organism where rules govern structural and functional complexity and the breakdown of these rules leads to pathologies (Salingaros, 2010). |
| Methods               | 20             | 2                       | Parts of the city are species in an ecosystem (Partanen, 2015).<br>City is a multistructural organism (Frenkel, 2004).                                                                                                                                                                                                                                                                                                                                                                                                                                                                                                |
| Transport             | 7              | 2                       | Slime mould formation of transport networks (Adamatzky et al., 2017)**.<br>Collective behaviour of people like that of bird swarms (Helbing et al., 2001).                                                                                                                                                                                                                                                                                                                                                                                                                                                            |
| Urban Growth          | 4              | 2                       | Slime mould growth and urban growth (Barker, 2012).<br>Fitness of land uses is relative to the fitness of other land uses on the fitness landscape, least fit land uses are removed, most fit are added (Andersson et al., 2002).                                                                                                                                                                                                                                                                                                                                                                                     |
| Urban Morphology      | 8              | 1                       | Systems of internal body flow akin to human movement (Mehaffy et al., 2010).                                                                                                                                                                                                                                                                                                                                                                                                                                                                                                                                          |
| Land Use              | 9              | 0                       |                                                                                                                                                                                                                                                                                                                                                                                                                                                                                                                                                                                                                       |
| Demographics          | 3              | 0                       |                                                                                                                                                                                                                                                                                                                                                                                                                                                                                                                                                                                                                       |
| Architecture          | 1              | 0                       |                                                                                                                                                                                                                                                                                                                                                                                                                                                                                                                                                                                                                       |
| Environmental         | 1              | 0                       |                                                                                                                                                                                                                                                                                                                                                                                                                                                                                                                                                                                                                       |
| Governance            | 1              | 0                       |                                                                                                                                                                                                                                                                                                                                                                                                                                                                                                                                                                                                                       |
| Housing               | 1              | 0                       |                                                                                                                                                                                                                                                                                                                                                                                                                                                                                                                                                                                                                       |
| Philosophy            | 1              | 0                       |                                                                                                                                                                                                                                                                                                                                                                                                                                                                                                                                                                                                                       |
| Policy                | 1              | 0                       |                                                                                                                                                                                                                                                                                                                                                                                                                                                                                                                                                                                                                       |

Supplementary Material 3. Articles included in the literature review by topic of article. Analogies are described where present. The table is sorted by (i) number of papers with analogies, (ii) number of self-organisation papers. \* signifies where the analogy was used during a critique of analogy and was not presented as the authors' own. \*\* signifies that the article was published online in 2016.

## References

Adamatzky A, Allard O, Jones J, Armstrong R. (2017). Evaluation of French motorway network in relation to slime mould transport networks.

*Environment and Planning B.* **44**(2):364–383

Andersson C, Rasmussen S, White R (2002) Urban Settlement Transitions. *Environment and Planning B.* **29**(6):841–865

Barker D. (2012). Slime Mold Cities. *Environment and Planning B.* **39**(2):262–286

Frenkel A. (2004). Land-use patterns in the classification of cities: the Israeli case. *Environment and Planning B.* **31**:711–730

Ganis M, Minnery J, Mateo-Babiano I. (2016). Planning people-places: A small world network paradigm for masterplanning with people in mind. *Environment and Planning B.* **43**(6):1075–1095

Girard L. (2014). Creative Initiatives in Small Cities Management: The Landscape as an Engine for Local Development. *Built Environment.* **40**(4):475–496

Helbing D, Farkas I, Molnar P, Bolay K. (2001). Self-organizing pedestrian movement. *Environment and Planning B.* **28**:361–383

Mehaffy M, Porta S, Rofè Y, Salingaros N. (2010). Urban nuclei and the geometry of streets: The ‘emergent neighborhoods’ model. *URBAN DESIGN International.* **15**(1):22–46

Partanen J. (2015) Indicators for self-organization potential in urban context. *Environment and Planning B.* **42**:951–971

Salingaros N. (2010). Complexity and Urban Coherence. *Journal of Urban Design*. **5**(3):291–316

Silva P. (2016). Tactical urbanism: Towards an evolutionary cities approach? *Environment and Planning B*. **43**(6):1040–1051
